1 **Title**

2 **Phylogenetic analysis of an emergent *Mycobacterium bovis* outbreak in an area with no**  
3 **previously known wildlife infections**

4

5 **Authors**

6 Gianluigi Rossi<sup>1</sup>, Joseph Crispell<sup>2</sup>, Tanis Brough<sup>3</sup>, Samantha J. Lycett<sup>1</sup>, Piran C. L. White<sup>4</sup>,

7 Adrian Allen<sup>5</sup>, Richard J. Ellis<sup>6</sup>, Stephen V. Gordon<sup>2,7</sup>, Roland Harwood<sup>8</sup>, Eleftheria

8 Palkopoulou<sup>3</sup>, Eleanor L. Presho<sup>5</sup>, Robin Skuce<sup>5</sup>, Graham C. Smith<sup>9</sup>, and Rowland R. Kao<sup>1\*</sup>

9

10 <sup>1</sup> Roslin Institute and Royal (Dick) School of veterinary Studies, University of Edinburgh,  
11 EH25 9RG, UK

12 <sup>2</sup> School of Veterinary Medicine, University College Dublin, Dublin D04, Ireland

13 <sup>3</sup> Department of Bacteriology, APHA, Weybridge, New Haw, Surrey, KT15 3NB

14 <sup>4</sup> Department of Environment and Geography, University of York, Wentworth Way, York  
15 YO10 5NG, UK

16 <sup>5</sup> Bacteriology Branch, Veterinary Sciences Division, Agri-food and Biosciences Institute,  
17 Belfast, BT4 3SD, UK

18 <sup>6</sup> Surveillance and Laboratory Services Department, APHA Weybridge, New Haw, Surrey,  
19 KT15 3NB, UK

20 <sup>7</sup> UCD Conway Institute, University College Dublin, Dublin D04, Ireland

21 <sup>8</sup> Veterinary Service, Department of Agriculture, Environment and Rural Affairs, Northern  
22 Ireland, UK

23 <sup>9</sup> National Wildlife Management Centre, APHA, Sand Hutton, York, YO41 1LZ, UK

24

25 \*Corresponding author: Rowland.Kao@ed.ac.uk

26

27           **Abstract**

28   Understanding how an emergent pathogen successfully establishes itself and persists in a  
29   previously unaffected population is a crucial problem in disease ecology. In multi-host  
30   pathogen systems this problem is particularly difficult, as the importance of each host species  
31   to transmission is often poorly characterised, and the epidemiology of the disease is complex.  
32   Opportunities to observe and analyse such emergent scenarios are few.

33   Here, we exploit a unique dataset combining densely-collected data on the epidemiological  
34   and evolutionary characteristics of an outbreak of *Mycobacterium bovis* (*M. bovis*, the  
35   causative agent of bovine tuberculosis, bTB) in a population of cattle and badgers in an area  
36   considered low-risk for bTB, that has no previous record of either persistent infection in  
37   cattle, or of any infection in wildlife.

38   We analyse the outbreak dynamics using a combination of mathematical modelling, machine  
39   learning and Bayesian evolutionary analyses. Comparison to *M. bovis* whole-genome  
40   sequences from Northern Ireland confirmed this to be a single introduction of the pathogen  
41   from the latter region, with evolutionary analysis supporting an introduction directly into the  
42   local cattle population at least six years prior to its first discovery in badgers. Once  
43   introduced, the evidence supports *M. bovis* epidemiological dynamics passing through two  
44   phases, the first dominated by cattle-to-cattle transmission before becoming established in the  
45   local badger population.

46   These findings emphasise the importance of disease surveillance for early containment of  
47   outbreaks, in particular for pathogens not causing immediately evident symptoms in the  
48   infected host, and highlight the utility of combining dynamic modelling and phylogenetic  
49   analyses for understanding the often complex infection dynamics associated with emergent  
50   outbreaks.

51

## 52           **1. Introduction**

53 Pathogens able to spread at the interfaces between livestock, wildlife, and humans are one of  
54 the most serious threats to human health, wildlife conservation, and livestock economic  
55 sustainability [1,2]. Generally, the spread of a pathogen is enhanced when it co-circulates in  
56 multiple sympatric host species, as interspecific and intraspecific transmissions can  
57 complement each other, resulting in pathogen persistence [3,4].

58 *M. bovis*, a member of the *Mycobacterium tuberculosis* complex (MTBC) [5], is responsible  
59 for bovine (or animal) tuberculosis (bTB) in domestic cattle and a range of wild mammals  
60 [6], including European badgers and deer in Great Britain and Ireland [7–9], deer and wild  
61 boar in the Iberian Peninsula [10,11], deer and elk in Michigan, US [12], possums in New  
62 Zealand [13,14], and water buffalo in South Africa [15].

63 In Great Britain and Ireland several studies have established an association between the  
64 presence of infected badger populations and the persistence of bTB in cattle [16–18]. More  
65 recently, researchers have been able to demonstrate that the same *M. bovis* strains are co-  
66 circulating in domestic cattle and sympatric badgers in endemic bTB areas, first using the  
67 pathogen's DNA genotyping techniques [19,20], and later using whole-genome sequencing  
68 [21,22]. Despite the efforts made by governments to control and eradicate bTB, the last  
69 decades have seen an increase in the number of cases and substantial expansion of bTB  
70 endemic areas, in particular in England and Wales [5,23]. The eradication efforts of this  
71 disease in England alone, costs the UK government around 100 million pounds per year  
72 [8,24,25].

73 Collecting reliable and up-to-date data about wildlife populations can present many  
74 challenges at broader scales [26] and while over the years many studies focused on  
75 characterising specific badger populations (see [27], and references therein), the lack of  
76 information in some areas might prevent the design of effective disease control practices

77 when bTB is introduced. In addition, broad surveys across England have shown that, since  
78 the mid-1980s, the estimated number of badger social groups has been increasing by 2.6%  
79 annually, contributing to the uncertainty around their level of contributions potential as bTB  
80 reservoir in different regions [28]. However, reliable estimates of badger density, movement,  
81 and potentially infectious contact patterns are poorly recorded in most regions of Great  
82 Britain and Ireland, with only few populations such as at Woodchester Park (Gloucestershire,  
83 England) subject to denser sampling, in this case since the 1980s [29].  
84 Further complications arise from the difficulty of estimating the true prevalence of *M. bovis*  
85 infection in badgers, as well as in domestic cattle. First is the elusive nature of *M. bovis*: the  
86 bacillus is characterised by slow replication with the potential for latent periods of variable  
87 length within the host [30,31]. In addition, the accuracy of currently available diagnostic tests  
88 is suboptimal in both cattle [32] and badgers [33]. These factors contribute to obscuring the  
89 relative roles of the two species in bTB maintenance and spread, and hampering the control  
90 and surveillance strategies. In particular, if both species are able to maintain the disease,  
91 control efforts focused on only one will be ineffective in achieving eradication [22].  
92 One of the main goals of the current control and eradication strategy in GB is to prevent bTB  
93 from becoming established in new non-endemic areas, in particular those officially  
94 categorised as “low-risk” [34]. Within the Low Risk Area of England (LRA), the eastern part  
95 of the Cumbria county in north-west England (hereafter referred to as ‘East Cumbria’), has  
96 recently experienced a bTB outbreak of unusual magnitude and duration for this area. The  
97 outbreak began in 2014 and by mid-2019, through enhanced TB surveillance testing of all  
98 cattle herds in the affected area of East Cumbria, it had resulted in the detection of 39  
99 breakdowns (positive cattle herds) across 33 premises [35]. The outbreak was caused by a  
100 strain of *M. bovis* (genotype) new to England, but previously observed in Northern Ireland,  
101 which was shown by preliminary molecular analyses to be the likely area of origin (Skuce,

102 personal communication). Surveillance of ‘found dead’ wildlife (badgers and wild deer) for  
103 *M. bovis* infection was initiated in September 2016 in the area by the Animal and Plant  
104 Health Agency (APHA) [35]. By August 2018 three (out of 52 inspected) roadkill badgers  
105 had been found to be infected, all of them with the same bacterium genotype previously  
106 isolated from local cattle herds. As a result of this epidemiological link, a badger cull was  
107 licensed in a defined area within the affected part of East Cumbria with the aim of eradicating  
108 the disease in badgers and cattle. During the first season of culling operations in the autumn  
109 of 2018, 11% of all the removed badgers were found to be infected, all animals with the same  
110 genotype, suggesting that *M. bovis* infection has become established in the local badger  
111 population.

112 The aim of this study was to shed light on the dynamic spread of *M. bovis* when introduced in  
113 a two-host system in a non-endemic area, for which the outbreak in East Cumbria provided  
114 us with a unique opportunity to closely study. Here, we describe the East Cumbria outbreak’s  
115 spatial and temporal characteristics, and identify the factors which led *M. bovis* infection  
116 becoming established in a wildlife population, while estimating the number of intraspecies  
117 and interspecies transmission events. Our approach includes the use of forensic molecular  
118 epidemiology [36], since over 60 isolates of *M. bovis* from the outbreak with usable whole  
119 genomic sequences were available at the time of writing; complete with precise metadata  
120 including dates, locations and, for cattle, animal and farm identifications.

121 Results of this study are an important step toward a deeper understanding of bTB  
122 introduction and establishment into non-endemic areas, thus assisting with the process of  
123 disease risk assignment and future policy decision making by the animal health authorities.

## 124 2. Results

### 125 2.1. Outbreak description

126 In November 2014, typical bTB lesions were detected via routine slaughterhouse inspection  
127 of a seven month-old male calf from a dairy herd in East Cumbria. Bacteriological culture of  
128 the lesions yielded an unusual genotype of *M. bovis*, designated 17:z by APHA (Figure 1, A).  
129 Following this first report, 23 more cattle were confirmed to be infected with the same strain  
130 in East Cumbria, with the last of these detected in November 2018 (at the time of writing).  
131 Further cattle were declared bTB positive (using the tuberculin skin test and/or  
132 supplementary interferon-gamma blood tests) during this period in the outbreak area,  
133 although an *M. bovis* bacilli could not be isolated. The 24 cattle infected with *M. bovis* 17:z  
134 genotype included three animals detected outside the outbreak area but still in Cumbria, as  
135 well as three in the neighbouring counties of Lancashire (two) and Yorkshire (one), all  
136 deemed likely to be part of the same outbreak due to associations through contact tracing.  
137 The index animal in this outbreak was a homebred calf that had never left its birth farm until  
138 it was moved to slaughter. Therefore, this animal could not have been the “case zero” of this  
139 outbreak. We attempted to trace back the first infected individual introduced in the outbreak  
140 area by analysing all the Cattle Trace System dataset records that included animals born in  
141 Northern Ireland or in the Republic of Ireland from 2009 to 2014. Tracing back the direct  
142 movements from Northern Ireland to the outbreak area indicated a limited number of “first  
143 arrival” premises (on average 9.3 per year, range 5-15), but unfortunately it did not reveal an  
144 obvious first introduction. Conversely, searching for indirect links between Northern Irish  
145 farms by selecting other British farms with links to the Cumbrian outbreak which previously  
146 imported animals from Northern Ireland, provided too many potential “arrival” premises (on  
147 average 216.5 and range 165-247, farms in the outbreak area per year).

148 During 2016 and 2017, respectively, two and 35 roadkill badger carcasses were reported to  
149 the local authorities within the designated outbreak area of East Cumbria. Three of the badger  
150 carcasses, retrieved respectively in January, February, and April 2017, were positive for *M.*  
151 *bovis* on culture (while two carcasses were unsuitable for inspection) (Figure S1.1), and all  
152 three positive animals were infected with the 17:z genotype.

153 The identification of infected badgers led Defra, following a public consultation, to issue a  
154 badger culling licence in a specified section of the outbreak area in the autumn of 2018.  
155 Culling operations from September to November 2018 resulted in 602 culled badgers, of  
156 which 369 were submitted for post mortem inspection and laboratory testing (Defra 2019). In  
157 total, 42 were culture positive for *M. bovis* and of those 38 isolates yielded a whole genome  
158 sequence of sufficient quality to enable phylogenetic analysis [37].

159 Data on found-dead surveillance of 2018 and 2019, but prior to the second culling season,  
160 included an additional 42 retrieved carcasses (29 and 13, respectively), all negative to *M.*  
161 *bovis*, except for 15 that were unsuitable for post-mortem inspection, and three still pending  
162 at the time of data gathering.

163

## 164 **2.2. Outbreak phylogeny and Northern Ireland isolates**

165 The phylodynamic tree of the East Cumbria outbreak is reported in Figure 1 (B). Early  
166 analyses identified a genotype usually found in Northern Ireland; further evidence showed  
167 the existence of cattle movements from this area to England and Wales. Coincidentally, the  
168 origin area included the recently completed Test, Vaccinate or Remove (TVR) trial area [38]  
169 in Northern Ireland (Skuce, personal communication) where extensive *M. bovis* whole  
170 genome sequencing had already been done – these isolates were included in the current  
171 analyses.

172 The complete phylogenetic tree (Figure 2) confirmed the association between the *M. bovis*  
173 circulating in the Northern Irish TVR area and in East Cumbria; thus it appeared that the East  
174 Cumbrian outbreak likely originated from the dominant strain circulating in or around the  
175 TVR area (Figure 2, orange branches) imported by movement of infected cattle, though the  
176 first introduction was not identified.

177

### 178 **2.3. Epidemiological signatures in genetic data**

179 Following our previous approach [22], epidemiological signatures in the sequence distances  
180 were identified using Boosted Regression Trees (BRT) [39], which combines decision trees  
181 and boosting techniques [40].

182 As previously, the dependent variable was the genetic distance between *M. bovis* strains,  
183 expressed as single nucleotide variants (SNVs); for explanatory variables we calculated 18  
184 relational covariates for each pair of sampled animals. These covariates are listed in Table 1  
185 and are divided into four categories: temporal (1 covariate), spatial (2 covariates), group (3  
186 covariates), and contact networks (12 covariates).

187 The BRT model on the full dataset (1,711 observations) was able to explain 41% (pseudo  $R^2$ )  
188 of the variability on the test dataset, while the Root Mean Squared Error (RMSE) was 0.94.

189 To test the robustness of this model we ran the same analysis on the same dataset but with an  
190 increasing percentage of randomly reassigned values for the dependent variable (SNV  
191 distance) observations. The results (Figure S3.1) showed that even for a limited percentage of  
192 re-assigned data (10%) the model underperformed substantially, explaining only 28% of the  
193 variation on average. The full model results (Figure 3) showed that the most important  
194 covariate to explain the SNV distance between isolates was the time between isolate  
195 samplings (25.2%), followed by the hosts populations' size (14.3%) and the geographical  
196 distance (considering both isolate sampling locations and between isolates land parcels,



197 respectively 11.3 and 9.3%). Among the contact network covariates, the degree in multi-layer  
198 (9.2%) and land parcels networks (9.1%) were the most important, while the covariates  
199 related to the single-species networks were not important (all lower than 4%). Partial  
200 dependency plots are reported in Figure S3.1.

201 We ran a further three BRT models: two of them considered the within-species interactions  
202 only, cattle-to-cattle (153 observations), and badger-to-badger (820 observations).

203 Conversely, the third model considered cross-species interactions (738 observations). These  
204 models were able to explain respectively 16%, 43% and 36% of the variation, while the  
205 respective RMSE values were 0.82, 1.04, and 0.96.

206 The covariates influence rankings in the badger and inter-species models were similar to the  
207 full model (sampling time distance the most influent, respectively, 19.6 and 26.7%), with the  
208 exception that in both cases the degree in the land parcels network was the third most  
209 influential covariate (11.4 and 12.0%). In the badger model the population size dropped to  
210 sixth (9.7%), while the geographic distance between sampling locations was second (14.5%).

211 The cattle model showed the most differences with the full model, with group size and degree  
212 in the land-parcel network being the most influential covariates (22.2 and 12.9%), while  
213 sampling time distance was third (11.0%).

214

#### 215 **2.4. Pairwise transmission probability and most likely transmission tree**

216 The pairwise transmission probability was calculated using the Kolmogorov Forward  
217 Equations (KFEs)[41], and the pairwise transmission probability matrix was reported in  
218 Figure 4. The KFEs methodology was used to calculate the probability of observing a pair of  
219 bTB infected hosts given their sampling time and the genetic divergence between their  
220 bacterial isolates, assuming that a direct transmission occurred between the pair.

221 The animal that infected the first detected cattle (C1) with *M. bovis* might have escaped  
222 detection, since the transmission probabilities from other sampled animals are low (median  
223  $0.13 \times 10^{-3}$ , range  $0 - 1.98 \times 10^{-3}$ ). Similarly, two out of three roadkill badgers (B44 and B18)  
224 had, respectively, the lowest and the third lowest average and maximum transmission  
225 probability from other sampled animals (see Figure 5). This indicates that animals infected  
226 early in the outbreak likely escaped detection (either the 4-year herd testing or carcass  
227 inspection), in particular the “case zero” (i.e. the first cow imported infected with the 17:z  
228 genotype of *M. bovis*).

229 In general, within-species transmission probabilities were higher than between-species ones  
230 (Figure S4.1), and the phylogenetic root-to-tip temporal signal was strong as well ( $R^2 = 0.39$ ,  
231 p-value  $\sim 0$ ; see Figure S4.2). This was consistent with the BRT model results, where the  
232 temporal signal was identified as the most important factor to predict the SNV distance.

233 We computed 10,000 “random trees” built by selecting random transmissions (except the  
234 ones for which the probability was zero because the cattle’s lifespans did not overlap).

235 Results showed that random trees had a median [95<sup>th</sup> quantile] of 17[13–21] cattle-to-cattle,  
236 26[21–31] badger-to-badger, 14[10–19] cattle-to-badger, and 6[2–10] badger-to-cattle  
237 transmissions (Figure S4.3). We computed the most likely transmission tree by selecting the  
238 transmissions with highest probability within the sampled animals while avoiding loops in  
239 the tree (see [41]). The best tree (Figure 4) showed that most of the transmissions in this  
240 system likely happened within-species, i.e. 20 cattle-to-cattle and 29 badger-to-badger,  
241 respectively. Conversely, inter-species transmissions comprised 12 cattle-to-badgers  
242 incidents, and 3 badgers-to-cattle. When comparing these results with the randomly  
243 computed trees, the most-likely tree showed a lower number of cross-species transmissions  
244 and a higher number of within-species transmissions, although the estimates fell in the 95<sup>th</sup>  
245 quantile of the random trees ones.

246

## 247 **2.5. BASTA analysis**

248 The transmission rates estimated by Bayesian Structured coalescent Approximation  
249 (BASTA) [42] on the 10 different sub-samples suggest that transmission from cattle-to-  
250 badgers occurred much more frequently (at least an order of magnitude) than transmission  
251 from badgers-to-cattle in Cumbria (Figure 7). In addition, there is little support for the  
252 inclusion of badgers-to-cattle transmission in the structured population model. In contrast,  
253 there is strong support for transmission of *M. bovis* from the sampled Northern Ireland area  
254 into the Cumbria area via the cattle population. Figure S5.1 shows the rate estimates that  
255 BASTA produced when no genomic data was provided, therefore only sampling dates were  
256 used. These analyses were conducted to determine how much signal there was in the genomic  
257 data to support the transmission rates being estimated. Given the contrasting rates shown in  
258 Figure 7 and Figure S5.1, there was strong evidence that there was sufficient signal in the *M.*  
259 *bovis* genomic data to estimate the transmission rates. Lastly, there is good agreement across  
260 the 10 sub-samples, suggesting that the estimated rates were robust to any inter-sub-sample  
261 variation.

262 Analyses in BASTA leveraging the temporal signal in the *M. bovis* genomic data were used  
263 to estimate the timing of *M. bovis* transmission from the cattle in the TVR area to cattle in  
264 Cumbria (Figure S4.4). Whilst credible intervals around these estimates were very broad, the  
265 transmission event was estimated to have occurred in March 2011 (lower 2.5% bound  
266 estimate: August 2001; upper 97.5% bound estimate: April 2014). This reflect the slow and  
267 variable replication rate characteristic of *M. bovis*.

268

### 269 3. Discussion

270 While it is accepted that cattle movements are responsible for transmission on a wide spatial  
271 scale [23,43,44], uncertainty remains around the relative roles of cattle and badger in  
272 maintaining and spreading *M. bovis* infection at local scales, complicating the formulation  
273 and execution of control policies. Our analyses of the East Cumbria outbreak highlight this  
274 dynamic, with the introduction of *M. bovis* most likely being caused by a cattle movement  
275 from Northern Ireland, followed by a more complex spread among local cattle and badgers.  
276 Identifying the source of infection for the index case in cattle in this outbreak (marked as C1  
277 in the figures) would be a crucial piece of information. Should a badger be the most likely  
278 infection source then this would imply an earlier establishment of the disease in wildlife (i.e.  
279 before or during 2014). Our results suggest another infected bovid as the most likely bTB  
280 source for the index case, but the transmission from known cases is poorly supported as the  
281 transmission probabilities from the other sampled animals to the index are generally low  
282 (Figure 5).

283 Overall, both the likely transmission tree selection (obtained with the KFEs) and the BASTA  
284 analysis indicate that most transmissions happened within-species, and that cattle-to-badger  
285 transmission has played a more important role than badger-to-cattle transmission, with  
286 similar outcomes obtained using two different analyses.

287 Our hypothesis, which is supported by the described results, is that after an initial seeding of  
288 *M. bovis* into the local East Cumbria cattle population, the infection subsequently became  
289 established in local badgers. Once that happened, rapid spread of the pathogen led to the  
290 observed 11% prevalence in the autumn of 2018, with peaks up to 20.9% in the core area  
291 [37]. Given the historically low prevalence of *M. bovis* in this area [45], the immunological  
292 naivete of this specific badgers population might have facilitated a quicker spread, although  
293 more research in this direction is needed. From a disease dynamic point of view, the

294 relatively higher number of predicted cattle-to-badger transmission events suggests that the  
295 establishment in badgers may happen when infection pressure from the sympatric cattle  
296 population reaches a threshold, rather than a single transmission event.

297 A concern might be that transmission tree outcomes have been affected by the sampling  
298 timeline, since early in the outbreak there are less *M. bovis* sampled sequences and most  
299 come from cattle, while later on the majority of sampled isolates come from badgers. While  
300 the BASTA analysis is designed to specifically reduce the effects of unbalanced sampling  
301 [42], our conclusions are also supported by a low genetic diversity in the recovered badger *M.*  
302 *bovis* isolates, which points to a relatively recent outbreak in this population. Nonetheless, the  
303 BASTA analysis was able to exploit this low genetic diversity, as it is shown by the different  
304 results of this model when neglecting the genetic information.

305 Similar to a previous study in a separate population [22], the Boosted Regression Trees  
306 (BRT) analysis indicated temporal bacterial isolation differences, and spatial distance  
307 between hosts, as the most important factors to predict inter-*M. bovis* genetic distance  
308 (SNVs). Another important variable was host population sizes, with bigger groups (farms or  
309 setts) linked to higher SNV distances. This result was particularly strong for the BRT models  
310 which included cattle isolates, and it is consistent with farms size being a risk factor for bTB  
311 [46,47].

312 Including different contact networks metrics variables in the BRT model can help to  
313 understand which transmission mechanism is more relevant in this system. Among these  
314 variables, the number of adjacent land parcels, corresponding to the spatial network's degree,  
315 was equal (full model) or more important (cattle, badger and inter-species models) than other  
316 metrics. This points to fine-scale spatial effects which cannot be entirely explained by the  
317 simple distance between samples locations. On the contrary, the single-species network  
318 metrics (animal movements for cattle and sett adjacency for badgers) were not significant in

319 any models. This might be the result of complex interactions between the two species that  
320 cannot be explained when considered individually, as previously suggested [48]. However,  
321 these interactions become evident when both species contact networks are included in a  
322 single framework such as multi-layer network [49].

323 The badger-to-badger model was able to predict the SNV distances in the test dataset slightly  
324 better than the full model (43% to 42%), despite reducing the sample size (from 1,711  
325 observations in the full model, to 820 in the badger only model). Furthermore, we observed  
326 that the SNV distance variability explained by the cattle only model was comparable to that  
327 of the full model when 20% of the data were randomly shuffled. This was surprising since  
328 more data are collected on domestic animals and this should provide a better picture than the  
329 equivalent wildlife data. One potential explanation is that the selected variables for this  
330 model might better explain *M. bovis* dynamics in badgers than in cattle, at the local scale.

331 However, when we consider this and the good explanatory power of the land parcels network  
332 metrics, we could speculate that the cattle dataset might hide some contact patterns. This  
333 could occur due to the inability to isolate *M. bovis* in all herd breakdowns or in all cattle, or  
334 due to unrecorded movements, with cattle grazing in several land parcels belonging to the  
335 same farm but not contiguous to the farm [50,51]. In general, the landscape and the farmland  
336 fragmentation and distribution in space, which is ignored when considering farms' main  
337 building locations only, might play a crucial role in disease dissemination. This calls for  
338 surveillance and control strategies to be adapted to specific contexts and informed by detailed  
339 veterinary investigation and spatial information, such as land parcel distribution.

340 By comparing the East Cumbria outbreak with other bTB in other contexts leads to some  
341 important insights. In East Cumbria, badgers have played a lesser role in the local persistence  
342 of the disease, the converse to what observed in a bTB endemic area in Woodchester Park  
343 [22]. This may be due to the "age" of the outbreak. Whilst in newly infected areas, and

344 therefore non-endemic, cattle-to-cattle and cattle-to-wildlife transmissions may dominate, in  
345 endemic areas the dynamic may have shifted towards a more complex dynamic, where  
346 wildlife can play a more important role. While in both cases breaking the transmission at the  
347 wildlife/livestock interface is critical, in outbreaks within low risk areas (non-endemic) it is  
348 crucial to prevent the establishment of bTB.

349 Questions remains as to how likely bTB is to get established in non-endemic areas, and how  
350 long it would take to detect it. From this perspective, the fact that the first introduction in this  
351 area (estimated to be 2011), and that the initial infected cattle were not detected until  
352 inspection at slaughter, indicates limitations of the bTB surveillance strategy in low risk areas  
353 and the importance of good biosecurity to reduce the risk of onward transmission to wildlife  
354 from introductions of cattle with undetected *M. bovis* infection. In order to mitigate this risk,  
355 in April 2016 Defra adopted mandatory post movement bTB testing of all cattle moved from  
356 high-risk to lower-risk areas [52].

357 To conclude, our analyses of the recent East Cumbria outbreak highlight how the  
358 transmission dynamics of *M. bovis* can change during the establishment in a non-endemic  
359 area, and how these changes affect the relative roles of wildlife and domestic animals in  
360 establishing and maintaining the infection. Our results suggest how genomic data and  
361 phylogenetic analyses are becoming fundamental to disentangle bacterial pathogen outbreaks,  
362 in particular when combined with epidemiological and network models [53]. Therefore,  
363 infrastructures for genomic surveillance can definitely help inform bTB and other endemic  
364 diseases control policies.

365 Finally, we highlight how local spatial dynamics might affect pathogen spread during the  
366 early phases of an outbreak. This makes the case for different diseases control strategies in  
367 endemic and non-endemic areas that take into account detailed characteristics about the  
368 system landscape and rearing practices, and for improving biosecurity, in order to achieve

369 minimal transmission at the cattle/wildlife interface and therefore preventing the

370 establishment of newly introduced diseases.

371



## 372 **Methods**

### 373 **4.1. Data description**

#### 374 ***4.1.1. Sequences and metadata***

375 Test positive cattle, found-dead badgers and most culled badgers in the Cumbria area were  
376 subject to post-mortem and culture of suitable tissues at the Animal and Plant Health Agency  
377 (APHA), with positive cultures subjected to genotyping and whole genome sequencing at the  
378 Central Sequencing Unit in Weybridge. 65 *M. bovis* whole-genome sequences were available  
379 from East Cumbria (65 in total, 24 from cattle, 3 from roadkill badgers, and 38 from culled  
380 badgers). The sampling timeline of the available sequences is reported in Figure S1.1. The  
381 metadata included a unique identifier, the sampling date, location coordinates (for badger  
382 isolates), and the farm's county-parish-holding (CPH) code (for cattle sequences only). The  
383 isolates and raw sequence data were processed using the same pipeline as described by  
384 Crispell et al. [22].

385 The East Cumbria outbreak dataset included a further sequence from the same *M. bovis*  
386 genotype sampled in Scotland (Figure S1.2). The epidemiological investigation showed that  
387 the animal was imported from Northern Ireland for slaughter only, thus we did not consider it  
388 in the analyses.

389

#### 390 ***4.1.2. Badger population***

391 A total of 160 badger setts were identified in and around the outbreak area in 2017/18 by the  
392 APHA, 117 of them were in the 2018 culling permit area. Badgers were both shot and  
393 trapped, with trapped animals subjected to post-mortem analysis, and population data  
394 (number of badgers removed, TB positive, negative, and TB status not determined) were  
395 available for 99 setts.

396

397 **4.1.3. Cattle population and outbreak area definition**

398 To obtain all infected cattle life histories (movements, birth and death) we first matched the  
399 sequences' unique identifier in the SAM dataset, then we extracted the data from the Cattle  
400 Tracing System (CTS) using the animal unique identifier.

401 The outbreak area was defined as the area within the minimum circle around the sequences  
402 sampling locations and all 160 badger setts, and adding to that all the parcels assigned to the  
403 infected farms which are contiguous to the above described circle (Figure 1, A). This study  
404 included all the farms active between 01/01/2010 and 31/12/2018 (which reported any cattle  
405 movements, births or deaths) directly located in the area or which owned a parcel in the  
406 outbreak area. The total number of selected cattle farms was 336.

407

408 **4.1.4. Northern Ireland TVR data**

409 The Test, Vaccinate or Remove (TVR) trial in Northern Ireland ran from 2014 to 2018, and it  
410 was designed to determine whether a combination of vaccination and an animal side TB test  
411 could be an effective means of controlling *M. bovis* infection in badger populations. During  
412 this period *M. bovis* samples were taken from infected cattle and badgers in the area for  
413 culturing.

414 All positive cultures were sequenced at the Agri-Food and Biosciences Institute in Belfast  
415 (AFBI-NI). In addition, archived *M. bovis* isolates that were stored as part of routine  
416 surveillance operations in the TVR area prior to the start of the trial were selected for  
417 sequencing. These additional isolates were sourced from routine test and slaughter  
418 surveillance of cattle or road killed badgers.

419 From the TVR area in Northern Ireland, there were 544 *M. bovis* genomes sourced from  
420 infected cattle (479) and badgers (65), sampled from 1996 to 2017. The distribution of  
421 sampling times for the *M. bovis* genomes is shown in Figure S1.1.

422

## 423 **4.2. Epidemiological information and machine learning analysis**

424 An important part of this analysis involved investigating the population, temporal, spatial,  
425 and contact network signatures in the sampled *M. bovis* genomic data [22]. We computed the  
426 inter-sequence Single Nucleotide Variants (SNV) distance and then we fitted a Poisson  
427 regression model using the Boosted Regression Trees [39] model in R [54].

428 As mentioned above, we used population, temporal, spatial, and network covariates, which  
429 are listed in Table 1. Network covariates (shortest distance, same community, degree, and  
430 number of infected nodes in the shortest path) were calculated for three contact networks:  
431 single species, spatial, and multi-layer.

432 The *single species network* accounted for only the within-species potential contacts. The  
433 cattle population's nodes corresponded to farms, and edges correspond to movements. In  
434 order to build these networks for each pair of cattle sequences, we only accounted for  
435 movements spanning from the previous year of the first of the two sequences sampled, to the  
436 year of the second one (i.e. if the two sequences were sampled respectively in 2015 and 2017,  
437 we computed the network by using movements recorded between 2014 and 2017). The  
438 badger population's nodes corresponded to setts, and since most of the trapped badgers  
439 occurred near a sett, their sequences were assigned to the closest one. We used the Voronoi  
440 partition (or Dirichlet tessellation) to create the edges between setts, in order to avoid relying  
441 on an assumption for the distance at which two setts were connected. In this network  
442 configuration the inter-species sequences are considered not connected.

443 The *spatial network* was built by considering each land parcel as a single node. Two land  
444 parcels were considered connected by the proximity criterion: if they shared a border or if the  
445 borders were closer than 100 meters. In this case, the degree of a node in this network (i.e.  
446 land parcel) corresponds to the number of neighbouring parcels.

447 Finally, the *multi-layer network* accounted for all the previously described contacts  
448 combined. In this case, nodes are defined as land parcels as well, but on top of the proximity  
449 criterion, two land parcels could also be connected if they include two farms or setts which  
450 were connected in the single species network.

451 The network communities were defined using the Louvain method which optimises the  
452 modularity, as provided in the R package *igraph* [55].

453 The model was run on the complete dataset (All Samples, Table 1 and Figure 3), on the cattle  
454 and badger isolates only, and on the inter-species isolates. In all cases the train and test  
455 dataset were half of the observations, while in the cattle dataset we used 60% for training and  
456 40% for testing, given the reduced observations compared to the others. We evaluated the  
457 models using the pseudo- $R^2$  calculation comparing the observed and predicted SNV distances  
458 on the test datasets, and the Root Mean Squared Error (RMSE). These were both calculated  
459 using the package *caret* [56]. For BRT the relative influence of the covariates is determined  
460 by the times each variable is selected to split the data in a decision tree, which in turn is  
461 weighted by the improvement to the model fit that resulted from that variable being used at  
462 each split [39]. All models were fitted with a 10-fold cross validation.

463 Preliminary runs of the models were used to tune the BRT parameters in order to improve the  
464 predictions. These parameters were the learning rate, which controls the contribution of each  
465 tree to the final model, and the tree complexity, which corresponds to the number of nodes in  
466 the tree. For the full dataset model the learning rate was set to 0.005 and the tree complexity  
467 to 5. For the other model we set the learning rate to 0.003, 0.009, and 0.0075 for the cattle,  
468 badger and inter-species dataset, respectively and the tree complexity to 7, 1, and 10.

469

#### 470 **4.3. Pairwise KFE and transmission tree reconstruction**

471 We calculated the transmission probability between pairs of animals where the *M. bovis*  
472 sequences have been sampled. We calculated this probability using the Kolmogorov-Forward  
473 Equations (KFE) methodology [41]. The KFEs consist of a set of ordinary differential  
474 equations which track the probability of a system to be in a given state through time [57–59].  
475 In the pairwise transmission case, the system state was given by the combination of the two  
476 hosts disease progression state and, once an individual is infected, by the number of SNVs on  
477 its *M. bovis* strain. The underlying assumption was that, at the time of infection, the two  
478 pathogen strains found in the source and recipient hosts are identical. After the infection, the  
479 two strains start to replicate, and thus substitution on the pathogen DNA happens at a rate  $\mu$   
480 (*substitution rate*), generating SNVs. Because the two strains are diverging, we will call the  
481 SNVs found in a strain sampled in the source host A [recipient host B] as *divergent* SNVs, or  
482 *divA*[*divB*]. The sum of *divA* and *divB* results in the SNV distance between the two strains.  
483 In order to use this methodology, we have to provide three main pieces of information: the  
484 pathogens sequences, the two hosts sampling time, and an underlying model representing the  
485 disease progression. For bTB, we chose to use a simple Susceptible-Exposed-Infectious  
486 model [23,60], where susceptible can become exposed (or latent) after contact with an  
487 infectious host with *infection rate*  $\beta$ , and exposed hosts move to the infectious state with  
488 *transition rate*  $\sigma$  (or after a latency period of average  $1/\sigma$ ). In this study, we provided the  
489 birth date of the cattle as well, in order to limit the time span where each cattle could have  
490 been infected first. For badgers we assumed a constant death rate, based on the observation  
491 that less than 0.1% of individuals would survive past 8-years of age [27]. The  
492 epidemiological parameters were chosen according the most recent literatures (see [41]), and  
493 in order to account for their variability, for each pairwise transmission we tested a 1'000  
494 combination of randomly selected parameters combinations and chose the one returning the  
495 highest probability.

496 Following Rossi et al. [41], we assembled the most likely transmission tree by progressively  
497 selecting the pairs with the highest transmission probability, and excluding those not possible  
498 given the previously selected ones (e.g. if  $A \rightarrow B$  and  $B \rightarrow C$  are selected,  $B \rightarrow A$ ,  $C \rightarrow B$  and  
499  $C \rightarrow A$  were going to be a priori excluded).

500

#### 501 **4.4. BASTA analysis**

502 Given that the phylogenetic evidence suggests a large amount of inter-species transmission is  
503 occurring in East Cumbria, the next critical question is in what direction? We used the  
504 Bayesian Structured coalescent Approximation (BASTA) package [42] with the Bayesian  
505 evolutionary analysis platform BEAST2 (Bayesian Evolutionary analysis by Sampling Trees;  
506 [61]) to estimate *M. bovis* inter-species transmission rates. The BASTA package was able to  
507 estimate these rates whilst accounting for the known structure and sampling biases in the  
508 study population. In the current study, the sampled *M. bovis* population was split into four  
509 different sub-populations based on host species (badger or cow) and location (Cumbria or  
510 TVR) (Figure S4.1). In addition, to estimate transmission rates in a structured population,  
511 BASTA is robust to sampling biases, which are likely to be present in the current *M. bovis*  
512 dataset. Importantly, it is assumed that transmission from TVR to Cumbria only occurred in  
513 one direction, as the Cumbria clade is monophyletic within the larger TVR phylogeny  
514 (Figure 2).

515 The evolutionary analyses using BASTA require that there is a temporal signal in the  
516 *M. bovis* genomic data. With the presence of a temporal signal, the accumulation of  
517 substitutions will be tied to the evolutionary processes of the sampled population, making it  
518 possible to leverage genetic variation to estimate evolutionary dynamics such as transmission  
519 rates. A root-to-tip versus sampling time regression was used to determine whether a  
520 measurable temporal signal was present in the *M. bovis* genomic data (Figure S4.2). The

521 positive trend observed in this regression indicates the presence of a weak temporal signal,  
522 therefore it was possible to proceed with the evolutionary analyses in BASTA.  
523 The computational complexity of the analyses to be conducted using BASTA meant that the  
524 large number of *M. bovis* genomes available within the outbreak clade (orange clade in  
525 Figure 2) had to be sub-sampled.  
526 In addition, it was only from 2014 to 2017 that the sampling of cattle and badgers in the TVR  
527 area can be considered approximately equal (in terms of effort). Therefore, only genomes  
528 sourced from infected cattle and badgers sampled from 2014 to 2018 were included in the  
529 BASTA analyses. The window was extended to 2018 to include the genomes sourced from  
530 Cumbria. The sub-sampling was then weighted to include samples from as many years as  
531 possible and from equal numbers of cattle and badgers. The sub-sampling was conducted 10  
532 times, each time selecting 20 badgers and 20 cattle-derived *M. bovis* genomes from Cumbria  
533 and 40 badger and 40 cattle-derived genomes from the TVR area (an example of a sub-  
534 sample is shown in Figure S4.3). A root-to-tip versus sampling time regression was  
535 conducted for each sub-sample and found to be positive in all cases. Each sub-sample was  
536 then analysed separately in BASTA.  
537

## 538 **References**

- 539 1. Gortazar C, Diez-Delgado I, Barasona JA, Vicente J, De La Fuente J, Boadella M. The  
540 Wild Side of Disease Control at the Wildlife-Livestock-Human Interface: A Review.  
541 Front Vet Sci. 2015;1: 1–12. doi:10.3389/fvets.2014.00027
- 542 2. Wiethoelter AK, Beltrán-Alcrudo D, Kock R, Mor SM. Global trends in infectious  
543 diseases at the wildlife–livestock interface. Proc Natl Acad Sci. 2015;112: 9662–9667.  
544 doi:10.1073/pnas.1422741112
- 545 3. Haydon DT, Cleaveland S, Taylor LH, Laurenson MK. Identifying reservoirs of  
546 infection: A conceptual and practical challenge. Emerg Infect Dis. 2002;8: 1468–1473.  
547 doi:10.3201/eid0812.010317
- 548 4. Craft ME, Hawthorne PL, Packer C, Dobson AP. Dynamics of a multihost pathogen in  
549 a carnivore community. J Anim Ecol. 2008;77: 1257–1264. doi:10.1111/j.1365-  
550 2656.2008.01410.x
- 551 5. Smith NH, Gordon S V., de la Rua-Domenech R, Clifton-Hadley RS, Hewinson RG.  
552 Bottlenecks and broomsticks: The molecular evolution of *Mycobacterium bovis*. Nat  
553 Rev Microbiol. 2006;4: 670–681. doi:10.1038/nrmicro1472
- 554 6. Palmer M V. *Mycobacterium bovis*: Characteristics of wildlife reservoir hosts.  
555 Transbound Emerg Dis. 2013;60: 1–13. doi:10.1111/tbed.12115
- 556 7. Skuce R, Breadon E, Allen A, Milne G, McCormick C, Hughes C, et al. Longitudinal  
557 dynamics of herd-level *Mycobacterium bovis* MLVA type surveillance in cattle in  
558 Northern Ireland 2003–2016. Infect Genet Evol. 2020;79: 104131.  
559 doi:10.1016/j.meegid.2019.104131
- 560 8. Godfray HCJ, Donnelly CA, Kao RR, Macdonald DW, McDonald R, Petrokofsky G,  
561 et al. A restatement of the natural science evidence base relevant to the control of  
562 bovine tuberculosis in Great Britain. Proc R Soc B Biol Sci. 2013;280: 1–18.



- 563 doi:10.1098/rspb.2013.1634
- 564 9. Crispell J, Cassidy S, Kenny K, McGrath G, Warde S, Cameron H, et al.  
565 *Mycobacterium bovis* genomics reveals transmission of infection between cattle and  
566 deer in Ireland. *Microb genomics*. 2020;6. doi:10.1099/mgen.0.000388
- 567 10. Anderson LG, Gortázar C, Vicente J, Hutchings MR, White PCL. Modelling the  
568 effectiveness of vaccination in controlling bovine tuberculosis in wild boar. *Wildl Res*.  
569 2013;40: 367–376. doi:10.1071/WR12139
- 570 11. Madeira S, Manteigas A, Ribeiro R, Otte J, Fonseca AP, Caetano P, et al. Factors that  
571 influence *Mycobacterium bovis* infection in Red Deer and Wild Boar in an  
572 Epidemiological Risk Area for Tuberculosis of Game Species in Portugal. *Transbound*  
573 *Emerg Dis*. 2017;64: 793–804. doi:10.1111/tbed.12439
- 574 12. Salvador LCM, O’Brien DJ, Cosgrove MK, Stuber TP, Schooley A, Crispell J, et al.  
575 Disease management at the wildlife-livestock interface: using whole-genome  
576 sequencing to study the role of elk in *Mycobacterium bovis* transmission in Michigan,  
577 USA. *Mol Ecol*. 2019; 1–14. doi:10.1111/mec.15061
- 578 13. Crispell J, Zadoks RN, Harris SR, Paterson B, Collins DM, de-Lisle GW, et al. Using  
579 whole genome sequencing to investigate transmission in a multi-host system: bovine  
580 tuberculosis in New Zealand. *BMC Genomics*. 2017;18: 180. doi:10.1186/s12864-  
581 017-3569-x
- 582 14. Anderson DP, Ramsey DSL, Nugent G, Bosson M, Livingstone P, Martin PAJ, et al. A  
583 novel approach to assess the probability of disease eradication from a wild-animal  
584 reservoir host. *Epidemiol Infect*. 2013;141: 1509–1521.  
585 doi:10.1017/S095026881200310X
- 586 15. Fitzgerald SD, Kaneene JB. Wildlife Reservoirs of Bovine Tuberculosis Worldwide:  
587 Hosts, Pathology, Surveillance, and Control. *Vet Pathol*. 2013;50: 488–499.

- 588           doi:10.1177/0300985812467472
- 589   16.   Martin SW, Eves J a, Dolan L a, Hammond RF, Griffin JM, Collins JD, et al. The  
590       association between the bovine tuberculosis status of herds in the East Offaly Project  
591       Area, and the distance to badger setts, 1988-1993. *Prev Vet Med.* 1997;31: 113–25.  
592       doi:10.1016/S0167-5877(96)01111-7
- 593   17.   Donnelly CA, Woodroffe R, Cox DR, Bourne FJ, Cheeseman CL, Clifton-Hadley RS,  
594       et al. Positive and negative effects of widespread badger culling on tuberculosis in  
595       cattle. *Nature.* 2006;439: 843–846. doi:10.1038/nature04454
- 596   18.   Donnelly CA, Woodroffe R, Cox DR, Bourne J, Gettinby G, Le Fevre AM, et al.  
597       Impact of localized badger culling on tuberculosis incidence in British cattle. *Nature.*  
598       2003;426: 834–837. doi:10.1038/nature02192
- 599   19.   Olea-Popelka FJ, Flynn O, Costello E, McGrath G, Collins JD, O’Keeffe J, et al.  
600       Spatial relationship between *Mycobacterium bovis* strains in cattle and badgers in four  
601       areas in Ireland. *Prev Vet Med.* 2005;71: 57–70. doi:10.1016/j.prevetmed.2005.05.008
- 602   20.   Woodroffe R, Donnelly CA, Cox DR, Gilks P, Jenkins HE, Thomas Johnston W, et al.  
603       Bovine tuberculosis in cattle and badgers in localized culling areas. *J Wildl Dis.*  
604       2009;45: 128–143. doi:10.7589/0090-3558-45.1.128
- 605   21.   Biek R, O’Hare A, Wright D, Mallon T, McCormick C, Orton RJ, et al. Whole  
606       Genome Sequencing Reveals Local Transmission Patterns of *Mycobacterium bovis* in  
607       Sympatric Cattle and Badger Populations. *PLoS Pathog.* 2012;8.  
608       doi:10.1371/journal.ppat.1003008
- 609   22.   Crispell J, Benton CH, Balaz D, De Maio N, Akhmetova A, Allen A, et al. Combining  
610       genomics and epidemiology to analyse bi-directional transmission of *Mycobacterium*  
611       *bovis* in a multi-host system. *Elife.* 2019; 1–36.  
612       doi:<https://doi.org/10.7554/eLife.45833.001>

- 613 23. Brooks-Pollock E, Roberts GO, Keeling MJ. A dynamic model of bovine tuberculosis  
614 spread and control in Great Britain. *Nature*. 2014;511: 228–231.  
615 doi:10.1038/nature13529
- 616 24. Tildesley MJ, Brand S, Brooks Pollock E, Bradbury N V., Werkman M, Keeling MJ.  
617 The role of movement restrictions in limiting the economic impact of livestock  
618 infections. *Nat Sustain*. 2019;2: 834–840. doi:10.1038/s41893-019-0356-5
- 619 25. Defra. Bovine TB Eradication Programme for England. 2011.
- 620 26. Craft ME. Infectious disease transmission and contact networks in wildlife and  
621 livestock. *Philosophical Transactions of the Royal Society B: Biological Sciences*.  
622 2015. pp. 20140107–20140107. doi:10.1098/rstb.2014.0107
- 623 27. Roper T. Badger. Collins; 2010. Available:  
624 <https://books.google.co.uk/books?id=FZhrPgAACAAJ>
- 625 28. Judge J, Wilson GJ, Macarthur R, Delahay RJ, McDonald RA. Density and abundance  
626 of badger social groups in England and Wales in 2011-2013. *Sci Rep*. 2014;4: 1–8.  
627 doi:10.1038/srep03809
- 628 29. Delahay RJ, Walker N, Smith GS, Wilkinson D, Clifton-Hadley RS, Cheeseman CL,  
629 et al. Long-term temporal trends and estimated transmission rates for *Mycobacterium*  
630 *bovis* infection in an undisturbed high-density badger (*Meles meles*) population.  
631 *Epidemiol Infect*. 2013;141: 1445–1456. doi:10.1017/S0950268813000721
- 632 30. Pollock JM, Neill SD. *Mycobacterium bovis* infection and tuberculosis in cattle. *Vet J*.  
633 2002;163: 115–127. doi:10.1053/tvj.2001.0655
- 634 31. Cassidy JP. The pathogenesis and pathology of bovine tuberculosis with insights from  
635 studies of tuberculosis in humans and laboratory animal models. *Veterinary*  
636 *Microbiology*. 2006. pp. 151–161. doi:10.1016/j.vetmic.2005.11.031
- 637 32. Nuñez-Garcia J, Downs SH, Parry JE, Abernethy DA, Broughan JM, Cameron AR, et

- 638 al. Meta-analyses of the sensitivity and specificity of ante-mortem and post-mortem  
639 diagnostic tests for bovine tuberculosis in the UK and Ireland. *Prev Vet Med.*  
640 2018;153: 94–107. doi:10.1016/j.prevetmed.2017.02.017
- 641 33. Drewe JA, Tomlinson AJ, Walker NJ, Delahay RJ. Diagnostic accuracy and optimal  
642 use of three tests for tuberculosis in live badgers. *PLoS One.* 2010;5.  
643 doi:10.1371/journal.pone.0011196
- 644 34. Perrin LD, Harris KA, Reynolds M, Lawes JR, Frost S, Brouwer A, et al. Bovine TB  
645 infection status in cattle in Great Britain in 2017. *Vet Rec.* 2019;184: 371–378.  
646 doi:10.1136/vr.11321
- 647 35. Defra. An update on TB surveillance in wildlife. 2019 [cited 26 May 2020] p. 6.  
648 Available:  
649 [https://assets.publishing.service.gov.uk/government/uploads/system/uploads/attachme](https://assets.publishing.service.gov.uk/government/uploads/system/uploads/attachment_data/file/830810/surveillance-wildlife-2018.pdf)  
650 [nt\\_data/file/830810/surveillance-wildlife-2018.pdf](https://assets.publishing.service.gov.uk/government/uploads/system/uploads/attachment_data/file/830810/surveillance-wildlife-2018.pdf)
- 651 36. Kao RR, Haydon DT, Lycett SJ, Murcia PR. Supersize me: How whole-genome  
652 sequencing and big data are transforming epidemiology. *Trends Microbiol.* 2014;22:  
653 282–291. doi:10.1016/j.tim.2014.02.011
- 654 37. Defra. TB surveillance in badgers during year 1 badger control operations in eastern  
655 Cumbria, Low Risk Area (2018). 2019 [cited 31 Oct 2020]. Available:  
656 [https://www.gov.uk/government/publications/bovine-tb-surveillance-in-wildlife-in-](https://www.gov.uk/government/publications/bovine-tb-surveillance-in-wildlife-in-england/tb-surveillance-in-badgers-during-year-1-badger-control-operations-in-eastern-cumbria-low-risk-area-2018)  
657 [england/tb-surveillance-in-badgers-during-year-1-badger-control-operations-in-](https://www.gov.uk/government/publications/bovine-tb-surveillance-in-wildlife-in-england/tb-surveillance-in-badgers-during-year-1-badger-control-operations-in-eastern-cumbria-low-risk-area-2018)  
658 [eastern-cumbria-low-risk-area-2018](https://www.gov.uk/government/publications/bovine-tb-surveillance-in-wildlife-in-england/tb-surveillance-in-badgers-during-year-1-badger-control-operations-in-eastern-cumbria-low-risk-area-2018)
- 659 38. DAERA-NI. The test and vaccinate or remove (TVR) wildlife intervention research  
660 project - year 2 report. [www.dardni.gov.uk/test-and-vaccinate-or-remove.htm](http://www.dardni.gov.uk/test-and-vaccinate-or-remove.htm). 2015.  
661 Available: [https://www.daera-ni.gov.uk/articles/test-and-vaccinate-or-remove-tvr-](https://www.daera-ni.gov.uk/articles/test-and-vaccinate-or-remove-tvr-wildlife-intervention-research)  
662 [wildlife-intervention-research](https://www.daera-ni.gov.uk/articles/test-and-vaccinate-or-remove-tvr-wildlife-intervention-research)

- 663 39. Elith J, Leathwick JR, Hastie T. A working guide to boosted regression trees. *J Anim*  
664 *Ecol.* 2008;77: 802–813. doi:10.1111/j.1365-2656.2008.01390.x
- 665 40. Brock PM, Fornace KM, Grigg MJ, Anstey NM, William T, Cox J, et al. Predictive  
666 analysis across spatial scales links zoonotic malaria to deforestation. *Proc R Soc B*  
667 *Biol Sci.* 2019;286. doi:10.1098/rspb.2018.2351
- 668 41. Rossi G, Crispell J, Balaz D, Lycett SJ, Delahay RJ, Kao RR. Identifying likely  
669 transmission pairs with pathogen sequence data using Kolmogorov Forward  
670 Equations; an application to *M.bovis* in cattle and badgers. *BiorXiv.* 2020; 1–32.  
671 doi:10.1101/2020.06.11.146894
- 672 42. De Maio N, Wu CH, O’Reilly KM, Wilson D. New Routes to Phylogeography: A  
673 Bayesian Structured Coalescent Approximation. *PLoS Genet.* 2015;11: 1–22.  
674 doi:10.1371/journal.pgen.1005421
- 675 43. Green DM, Kiss IZ, Mitchell AP, Kao RR. Estimates for local and movement-based  
676 transmission of bovine tuberculosis in British cattle. *Proc R Soc B Biol Sci.* 2008;275:  
677 1001–1005. doi:10.1098/rspb.2007.1601
- 678 44. Gilbert M, Mitchell A, Bourn D, Mawdsley J, Clifton-Hadley R, Wint W. Cattle  
679 movements and bovine tuberculosis in Great Britain. *Nature.* 2005;435: 491–496.  
680 doi:10.1038/nature03548
- 681 45. Atkins PJ, Robinson PA. Bovine tuberculosis and badgers in Britain: Relevance of the  
682 past. *Epidemiol Infect.* 2013;141: 1437–1444. doi:10.1017/S095026881200297X
- 683 46. Salvador LCM, Deason M, Enright J, Bessell PR, Kao RR. Risk-based strategies for  
684 surveillance of tuberculosis infection in cattle for low-risk areas in England and  
685 Scotland. *Epidemiol Infect.* 2018;146: 107–118. doi:10.1017/S0950268817001935
- 686 47. Brooks-Pollock E, Keeling M. Herd size and bovine tuberculosis persistence in cattle  
687 farms in Great Britain. *Prev Vet Med.* 2009;92: 360–365.

- 688 doi:10.1016/j.prevetmed.2009.08.022
- 689 48. Silk MJ, Drewe JA, Delahay RJ, Weber N, Steward LC, Wilson-Aggarwal J, et al.  
690 Quantifying direct and indirect contacts for the potential transmission of infection  
691 between species using a multilayer contact network. *Behaviour*. 2018.  
692 doi:10.1163/1568539X-00003493
- 693 49. Kinsley AC, Rossi G, Silk MJ, VanderWaal K. Multilayer and Multiplex Networks:  
694 An Introduction to Their Use in Veterinary Epidemiology. *Frontiers in Veterinary*  
695 *Science*. 2020. p. 596. doi:10.3389/fvets.2020.00596
- 696 50. Hamilton L, Evans N, Allcock J. “i don’t go to Meetings”: Understanding farmer  
697 perspectives on bovine TB and biosecurity training. *Vet Rec*. 2019;184: 1–8.  
698 doi:10.1136/vr.104995
- 699 51. Campbell EL, Byrne AW, Menzies FD, McBride KR, McCormick CM, Scantlebury  
700 M, et al. Interspecific visitation of cattle and badgers to fomites: A transmission risk  
701 for bovine tuberculosis? *Ecol Evol*. 2019;9: 8479–8489. doi:10.1002/ece3.5282
- 702 52. Defra. Bovine TB Information Note 03 / 16 Reducing TB risks from the sale of cattle  
703 from 4-yearly testing herds in England. 2016. Available:  
704 [https://www.gov.uk/government/publications/bovine-tb-information-note-0116-post-](https://www.gov.uk/government/publications/bovine-tb-information-note-0116-post-movement-testing)  
705 [movement-testing](https://www.gov.uk/government/publications/bovine-tb-information-note-0116-post-movement-testing)
- 706 53. Campbell F, Strang C, Ferguson N, Cori A, Jombart T. When are pathogen genome  
707 sequences informative of transmission events? *PLoS Pathog*. 2018;14: 1–21.  
708 doi:10.1371/journal.ppat.1006885
- 709 54. R Core Team. R: A Language and Environment for Statistical Computing. Vienna,  
710 Austria; 2018. Available: <https://www.r-project.org/>
- 711 55. Csárdi G, Nepusz T. The igraph software package for complex network research. *J*  
712 *Comput Appl*. 2014;Complex Sy: 9. doi:10.3724/SP.J.1087.2009.02191

- 713 56. Kuhn M, Weston S, Keefer C, Engelhardt A, Cooper T, Mayer Z, et al. Classification  
714 and Regression Training. 2016. p. 198. Available: [https://cran.r-](https://cran.r-project.org/package=caret)  
715 [project.org/package=caret](https://cran.r-project.org/package=caret)
- 716 57. Stollenwerk N, Jansen VAA. Meningitis, pathogenicity near criticality: The  
717 epidemiology of meningococcal disease as a model for accidental pathogens. *J Theor*  
718 *Biol.* 2003;222: 347–359. doi:10.1016/S0022-5193(03)00041-9
- 719 58. Sharkey KJ. Deterministic epidemiological models at the individual level. *J Math Biol.*  
720 2008;57: 311–331. doi:10.1007/s00285-008-0161-7
- 721 59. Keeling MJ, Ross J V. On methods for studying stochastic disease dynamics. *J R Soc*  
722 *Interface.* 2008;5: 171–181. doi:10.1098/rsif.2007.1106
- 723 60. Rossi G, De Leo GA, Pongolini S, Natalini S, Vincenzi S, Bolzoni L. Epidemiological  
724 modelling for the assessment of bovine tuberculosis surveillance in the dairy farm  
725 network in Emilia-Romagna (Italy). *Epidemics.* 2015;11: 62–70.  
726 doi:10.1016/j.epidem.2015.02.007
- 727 61. Bouckaert R, Heled J, Kühnert D, Vaughan T, Wu CH, Xie D, et al. BEAST 2: A  
728 Software Platform for Bayesian Evolutionary Analysis. *PLoS Comput Biol.* 2014;10:  
729 1–6. doi:10.1371/journal.pcbi.1003537
- 730
- 731

732 **Tables**

| Category | Covariates         | Description                                                                                       | All samples model | Cattle model | Badger model | Inter-species model |
|----------|--------------------|---------------------------------------------------------------------------------------------------|-------------------|--------------|--------------|---------------------|
| Temporal | SampleTimeDist     | Time distance (in days) between the isolates sample dates                                         | YES               | YES          | YES          | YES                 |
| Spatial  | SampleGeoDist      | Geographical Euclidean distance between the isolates sampling locations                           | YES               | YES          | YES          | YES                 |
| Spatial  | ParcelsDist        | Minimum geographical Euclidean distance between the land parcels where isolates have been sampled | YES               | YES          | YES          | YES                 |
| Group    | SameSpecies        | Isolates from same species animals (YES/NO)                                                       | YES               | NO           | NO           | NO                  |
| Group    | SameGroup          | Isolates from same herd or sett animals (YES/NO)                                                  | YES               | YES          | YES          | NO                  |
| Group    | Sizes              | Size coefficient (squared root of product) of the isolates herd/social groups                     | YES               | YES          | YES          | YES                 |
| Network  | ShortestPathSNet   | Shortest path length between isolates nodes in single-species network                             | YES               | YES          | YES          | NO                  |
| Network  | InfNodesInPathSNet | Number of infected nodes in shortest path between isolates in single-species network              | YES               | YES          | YES          | NO                  |
| Network  | DegreeSNet         | Degree coefficient (squared root of product) of isolates nodes in single-species network          | YES               | YES          | YES          | NO                  |
| Network  | SameCommSNet       | Isolates' nodes in same community in single-species network (YES/NO)                              | YES               | YES          | YES          | NO                  |
| Network  | ShortestPathLPNet  | Shortest path length between isolates nodes in spatial (land parcels) network                     | YES               | YES          | YES          | YES                 |
| Network  | InfParcInPathLPNet | Number of infected nodes in shortest path between isolates in spatial network                     | YES               | YES          | YES          | YES                 |
| Network  | DegreeLPNet        | Degree coefficient (squared root of product) of isolates nodes in spatial network                 | YES               | YES          | YES          | YES                 |
| Network  | SameCommLPNet      | Isolates' nodes in same community in spatial network (YES/NO)                                     | YES               | YES          | YES          | YES                 |
| Network  | ShortestPathML     | Shortest path length between isolates nodes in multi-layer network                                | YES               | YES          | YES          | YES                 |
| Network  | InfNodesInPathML   | Number of infected nodes in shortest path between isolates in multi-layer network                 | YES               | YES          | YES          | YES                 |
| Network  | DegreeML           | Degree coefficient (squared root of product) of isolates nodes in multi-layer network             | YES               | YES          | YES          | YES                 |
| Network  | SameCommML         | Isolates' nodes in same community in multi-layer network (YES/NO)                                 | YES               | YES          | YES          | YES                 |

733



734 **Table 1. Epidemiological covariates tested in the BRT algorithm.** List of epidemiological  
735 covariates tested in the boosted regression trees (BRT) algorithm against the isolates genetic  
736 distance, calculated in number of SNVs. The four columns indicate in which model the  
737 covariate has been used.  
738

739 **Figures**

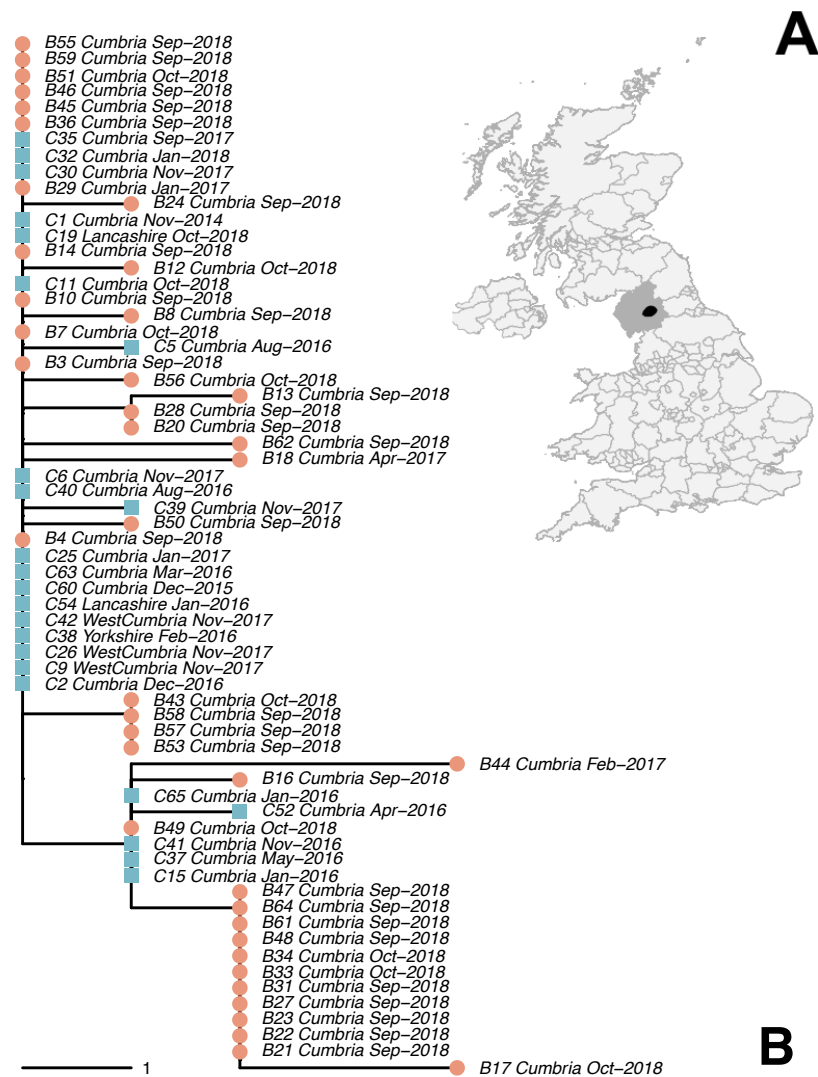

740

741 **Figure 1. East Cumbria outbreak area and phylogenetic tree.** A: East Cumbria outbreak

742 area (black) location in Cumbria (dark grey). B: *M. bovis* genomes phylogenetic tree

743 (distance calculated in Single Nucleotide Variants, SNVs). Red dots represent badgers, and

744 blue square cattle, and the label report the code assigned to each individual, sampling

745 location and sample date.

746

747

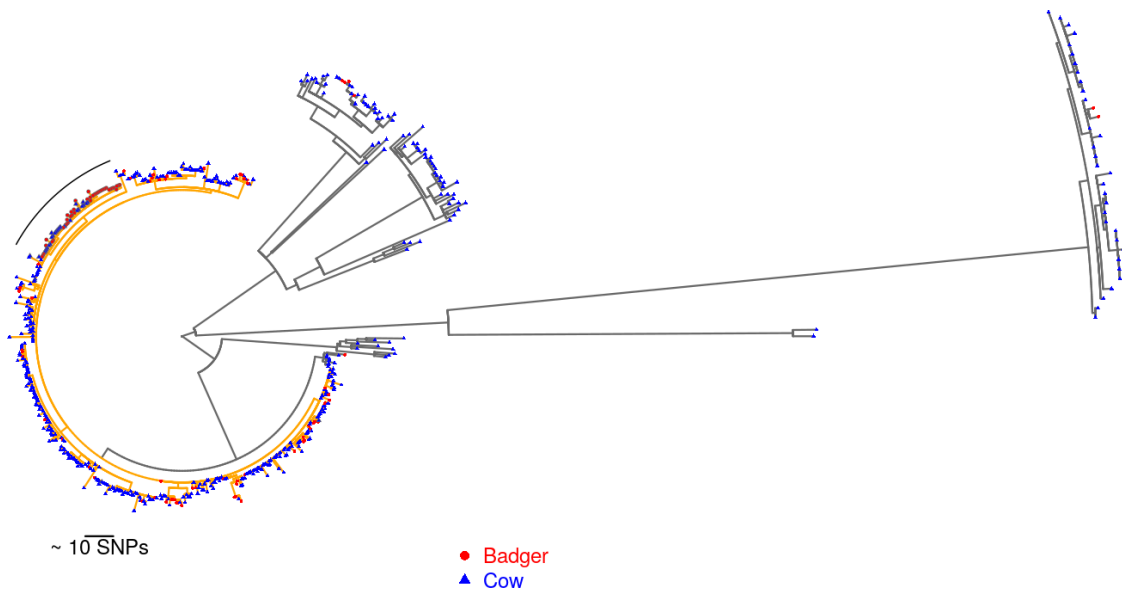

748 **Figure 2. East Cumbria and TVR *M. bovis* phylogenies.** A maximum likelihood  
749 phylogeny of the *M. bovis* genomes sourced from Cumbria and the Test, Vaccinate, or  
750 Release (TVR) area in Northern Ireland. The tree is rooted with the *M. bovis* reference  
751 genome AF2122/97. The *M. bovis* genomes sourced from infected cattle and badgers in  
752 Cumbria are highlighted with a black semi-circle at the top left. The branches of the clade  
753 containing the *M. bovis* genomes sourced from Cumbria, and those from the TVR area that  
754 are most similar is highlighted in orange.

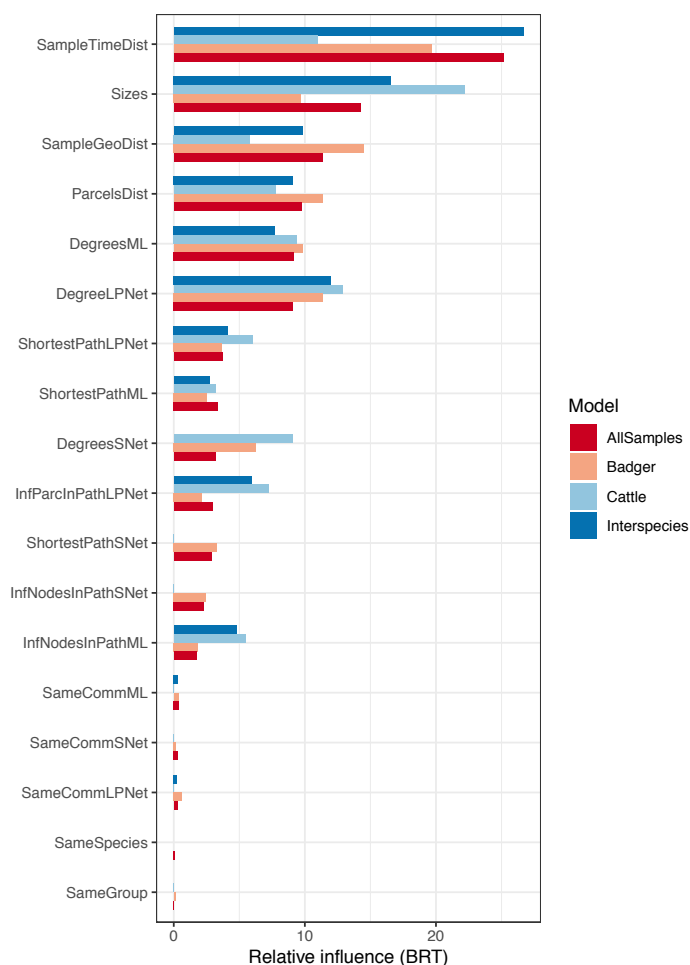

755

756 **Figure 3. Covariate influence in the BRT models.** The relative influence of the 18  
757 epidemiological covariates calculated by the Boosted Regression Trees (BRT) model. Bars  
758 colours correspond to the four models run with different sub-samples of the dataset: dark-red  
759 for the full model account all samples, light red for the badger-to-badger model, light-blue for  
760 the cattle-to-cattle only model, and dark-blue for the interspecies (badger-to-cattle) model.

761

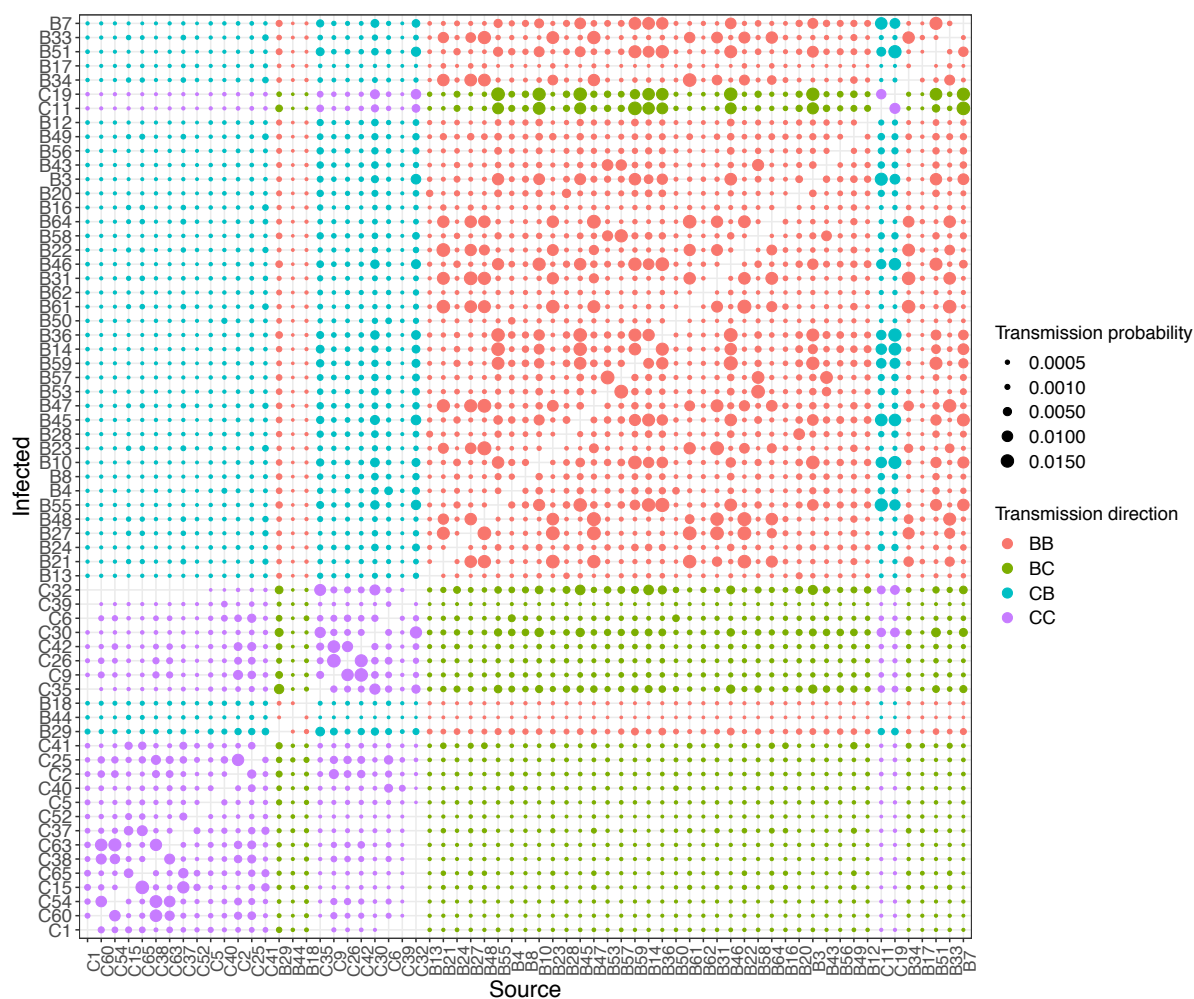

762

763 **Figure 4. Transmission matrix.** Pairwise transmission probabilities between infected  
764 animals in the East Cumbria outbreak. Animals are reported in  $x$  (source animal) and  $y$   
765 (infected animal) axes in the order they have been sampled, and they are labelled from one to  
766 65 and the species name (B for badgers and C for Cattle). Different colours correspond to  
767 transmission directions (red: badger-to-badger, green: badger-to-cow, light-blue: cattle-to-  
768 badger, and magenta: cattle-to-cattle).

769

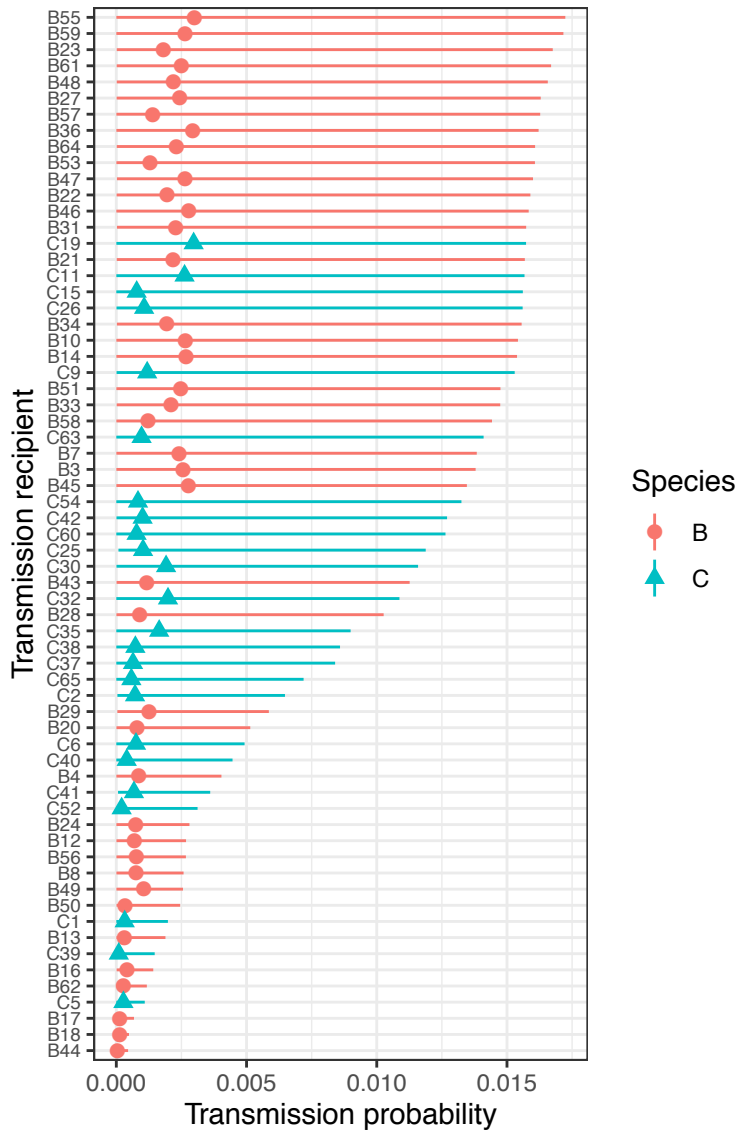

770

771 **Figure 5. Transmission probability to sequenced animals.** Average (dots/triangles) and

772 range (line) of infection probabilities (x axis) from all sampled infection sources to each

773 individual animal (y axis). Red lines/dots correspond to badgers and blue lines/triangles to

774 cattle.

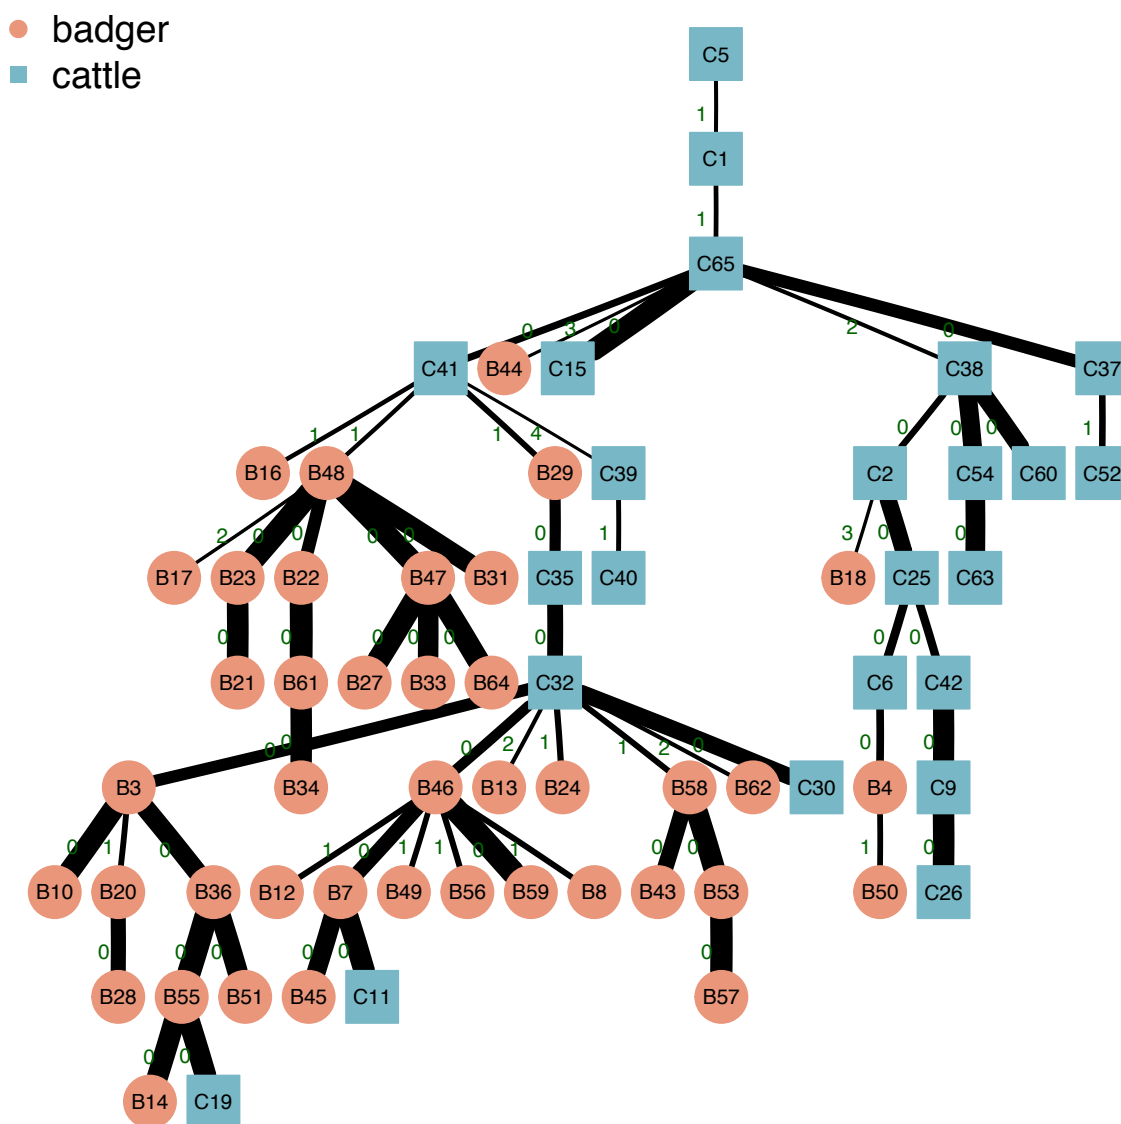

775

776 **Figure 6. East Cumbria *M. bovis* outbreak transmission tree.** Most likely transmission for  
777 the sampled infectious individuals in the East Cumbria outbreak (transmissions from top to  
778 bottom). Red circles correspond to badgers, and blue squares to cattle. Edge thickness is  
779 proportional to the pair transmission probability and the edge label (dark green) indicates the  
780 SNV distance between the two individuals.

781

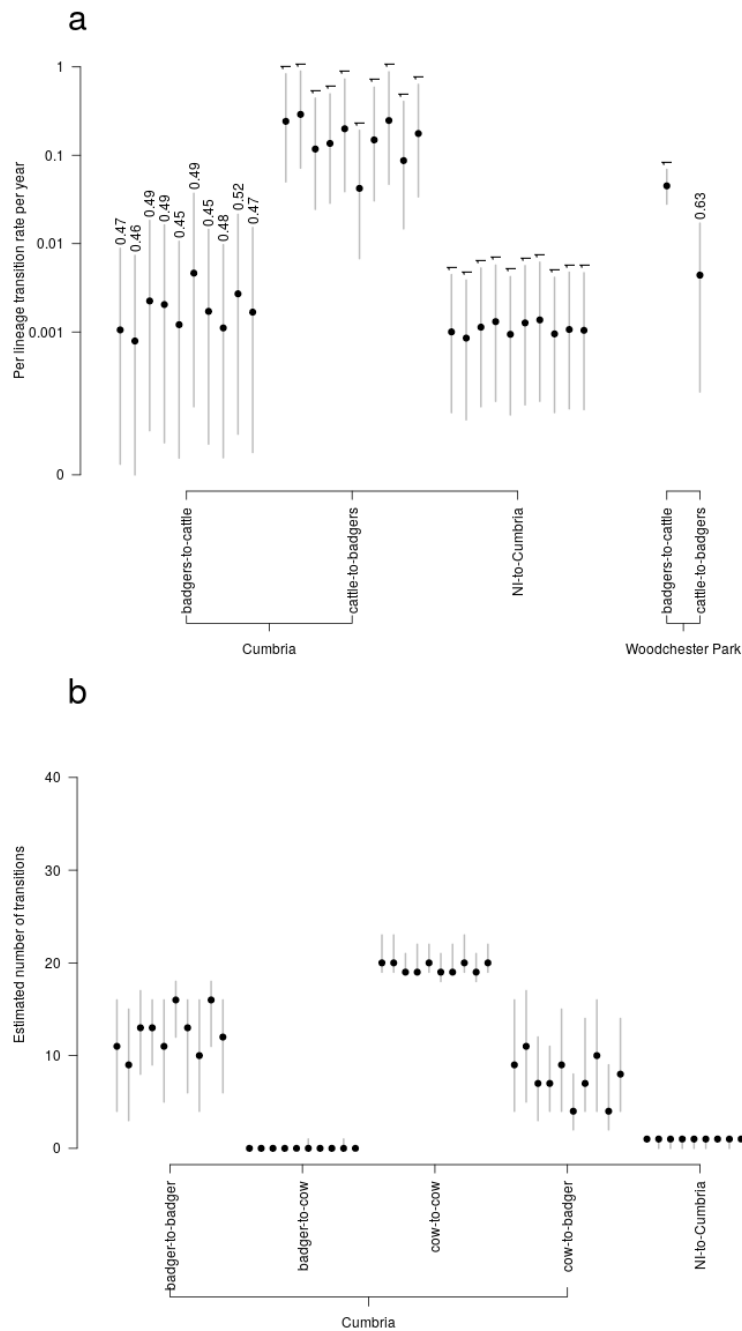

782

783 **Figure 7. Transmission rates and number of transmissions estimated with BASTA. a)**

784 Inter-species and Northern Ireland to Cumbria *M. bovis* transmission rates (y axes, log scale)

785 estimated using BASTA, based on analyses that used the genomic data and compared with

786 the results for Woodchester Park [22]; b) estimates from BASTA of the number of

787 transmission events (y axes) between the sampled cattle and badgers.
